# Supplementary material for: Formation of dodecaphenylporphodimethene via facile protonation of saddle-distorted dodecaphenylporphyrin
Source: Royal Society of Chemistry journal article supplement (doi:10.1039/b816063e), 2008-01-01
Supplement: b816063e.pdf [file b816063e.pdf]

Supplementary Information for

## Formation of dodecaphenylporphodimethene via facile protonation of saddle-distorted dodecaphenylporphyrin

Takahiko Kojima,<sup>\*a</sup> Kakeru Hanabusa,<sup>a</sup> Kei Ohkubo,<sup>a</sup> Motoo Shiro,<sup>b</sup> and Shunichi Fukuzumi<sup>\*a</sup>

<sup>a</sup> *Department of Material and Life Science, Graduate School of Engineering, Osaka University and SORST (JST), 2-1 Yamada-oka, Suita, Osaka 565-0871, Japan.*

<sup>b</sup> *X-ray Research Laboratory, Rigaku Corporation, 3-9-12 Matsubara, Akishima-shi, Tokyo 196-8666, Japan.*

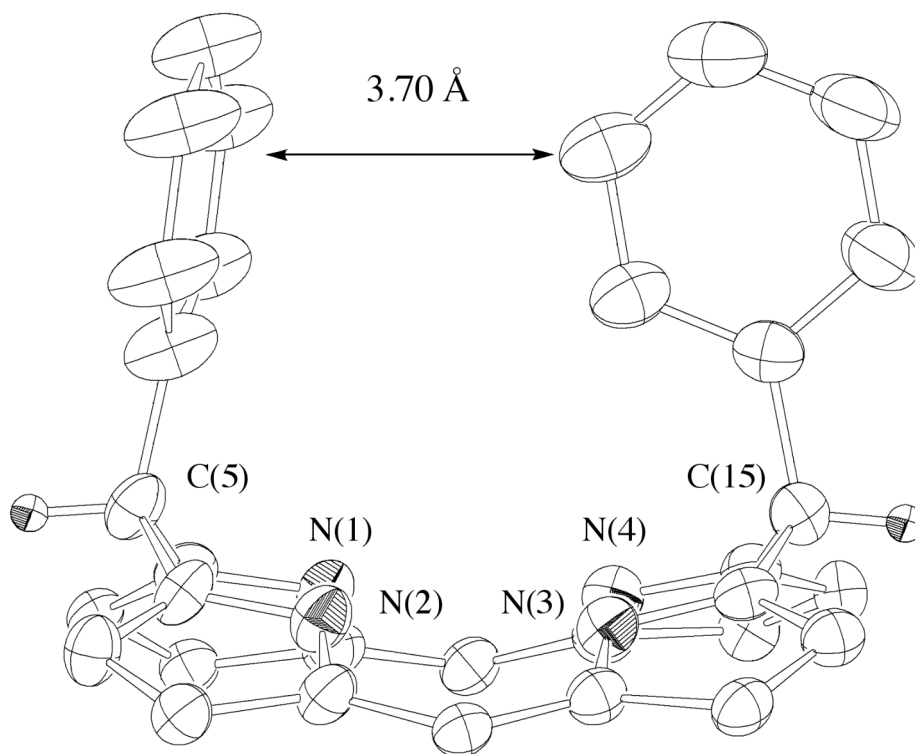

**Figure S1.** An ORTEP drawing of **1** (50% probability thermal ellipsoids) without showing peripheral phenyl groups except two of them at the 5- and 15-positions. The distance is between the carbon atom indicated and the centroid of the other phenyl ring.

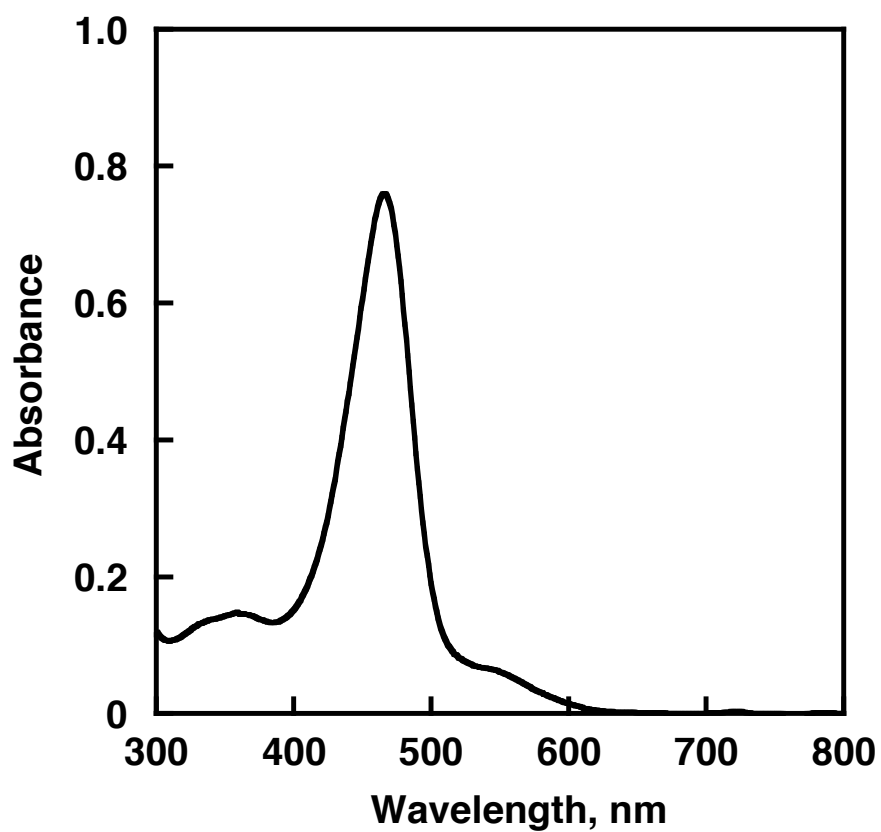

**Figure S2.** Absorption spectrum of **1** in CH<sub>2</sub>Cl<sub>2</sub> at room temperature;  $\lambda_{\text{max}}$ , nm ( $\epsilon$ , dm<sup>3</sup> mol<sup>-1</sup> cm<sup>-1</sup>): 465 ( $6.96 \times 10^4$ ), 540 ( $6.14 \times 10^3$ ).

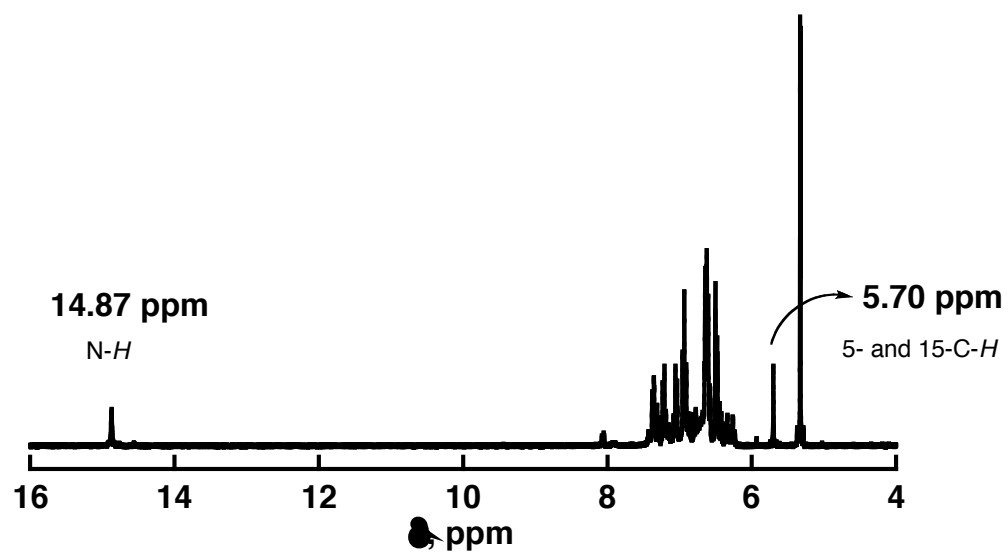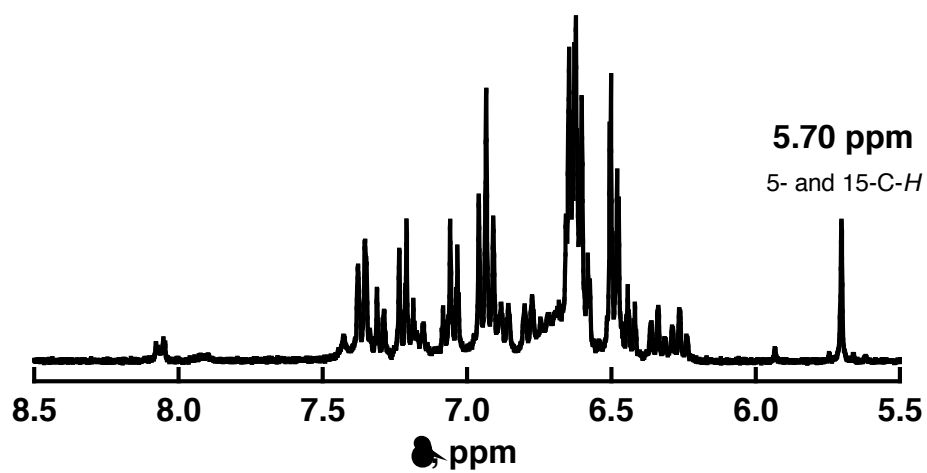

**Figure S3.** <sup>1</sup>H NMR spectrum (300 MHz) of **1** in CD<sub>2</sub>Cl<sub>2</sub> at room temperature.

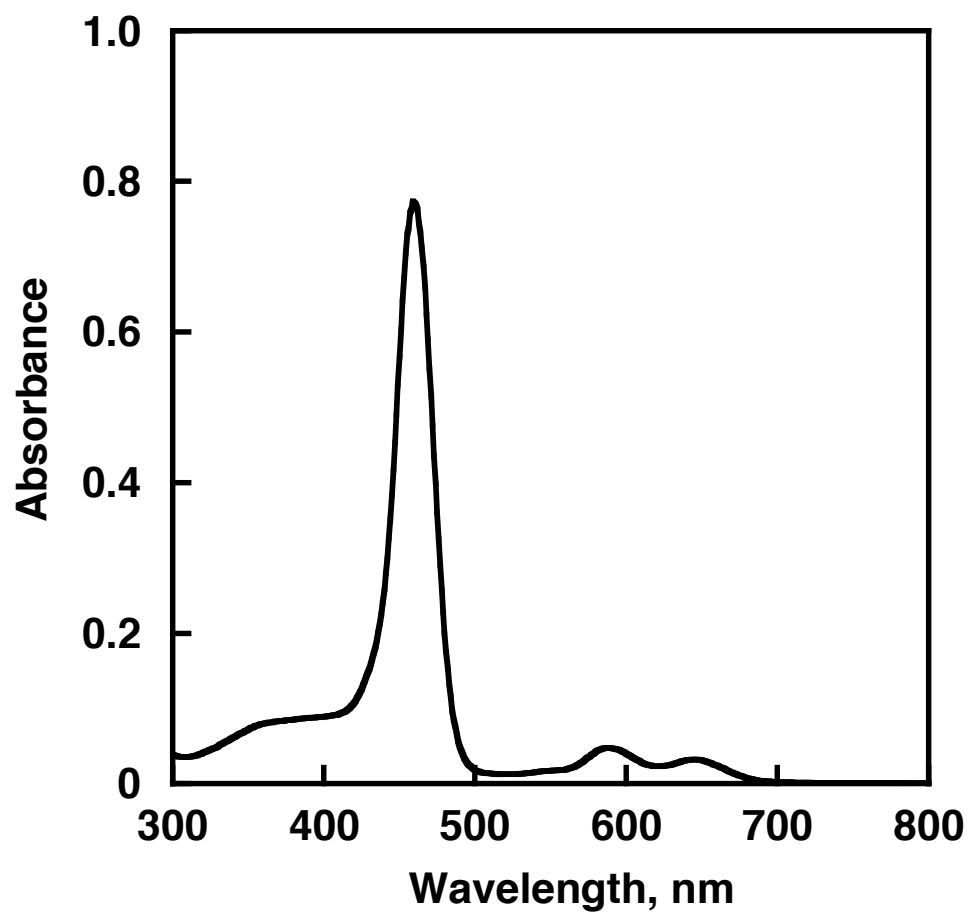

**Figure S4.** Absorption spectrum of [Sn(DPP)Cl<sub>2</sub>] in CH<sub>2</sub>Cl<sub>2</sub> at room temperature;  $\lambda_{\text{max}}$ , nm ( $\epsilon$ , dm<sup>3</sup> mol<sup>-1</sup> cm<sup>-1</sup>): 460 ( $2.97 \times 10^5$ ), 588 ( $1.85 \times 10^4$ ), 645 ( $1.24 \times 10^4$ ).

Elemental analysis for [Sn(DPP)Cl<sub>2</sub>]•CHCl<sub>3</sub>•CH<sub>2</sub>Cl<sub>2</sub>: Calcd for SnC<sub>92</sub>H<sub>60</sub>N<sub>4</sub>Cl<sub>2</sub>•CH<sub>2</sub>Cl<sub>2</sub>•CHCl<sub>3</sub>: C, 69.89; H, 3.93; N, 3.47. Found: C, 70.15; H, 4.07; N, 3.68.

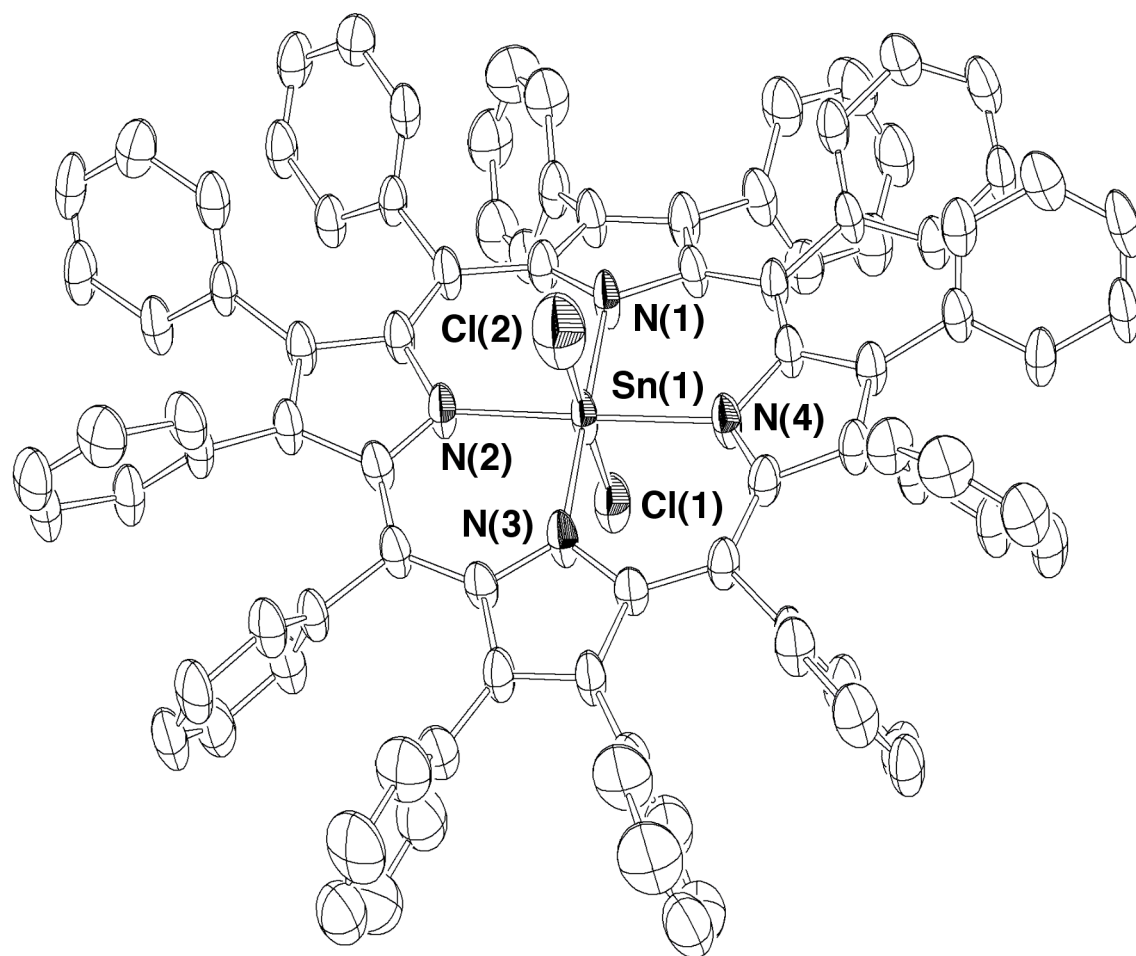

**Figure S5.** An ORTEP drawing of [Sn(DPP)Cl<sub>2</sub>] with 50 % probability thermal ellipsoids and selected atom numbering scheme. Hydrogen atoms are omitted for clarity.

The list of authors of ref. 9.

M. J. Frisch, G. W. Trucks, H. B. Schlegel, G. E. Scuseria, M. A. Robb, J. R. Cheeseman, J. A. Montgomery, J. T. Vreven, K. N. Kudin, J. C. Burant, J. M. Millam, S. S. Iyengar, J. Tomasi, V. Barone, B. Mennucci, M. Cossi, G. Scalmani, N. Rega, G. A. Petersson, H. Nakatsuji, M. Hada, M. Ehara, K. Toyota, R. Fukuda, J. Hasegawa, M. Ishida, T. Nakajima, Y. Honda, O. Kitao, H. Nakai, M. Klene, X. Li, J. E. Knox, H. P. Hratchian, J. B. Cross, C. Adamo, J. Jaramillo, R. Gomperts, R. E. Stratmann, O. Yazyev, A. J. Austin, R. Cammi, C. Pomelli, J. W. Ochterski, P. Y. Ayala, K. Morokuma, G. A. Voth, P. Salvador, J. J. Dannenberg, V. G. Zakrzewski, S. Dapprich, A. D. Daniels, M. C. Strain, O. Farkas, D. K. Malick, A. D. Rabuck, K. Raghavachari, J. B. Foresman, J. V. Ortiz, Q. Cui, A. G. Baboul, S. Clifford, J. Cioslowski, B. B. Stefanov, G. Liu, A. Liashenko, P. Piskorz, I. Komaromi, R. L. Martin, D. J. Fox, T. Keith, M. A. Al-Laham, C. Y. Peng, A. Nanayakkara, M. Challacombe, P. M. W. Gill, B. Johnson, W. Chen, M. W. Wong, C. Gonzalez, J. A. Pople, *Gaussian 03, Revision C.02*, Gaussian, Inc., Wallingford, CT, 2004.
